# Supplementary material
Source: MDPI journal article supplement (https://www.mdpi.com/2073-4433/13/1/64)
Supplement: s1 [file s1]

# Supplementary Materials: Change Points Detection and Trend Analysis to Characterize Changes in Meteorologically Normalized Air Pollutant Concentrations

Roberta Valentina Gagliardi <sup>1,\*</sup> and Claudio Andenna <sup>2</sup>

## Model evaluation parameters

The statistical indicators used to assess the performances of the selected optimal RF model by comparing predicted and observed pollutants concentrations values are, the coefficient of determination ( $R^2$ ), the mean bias error (MBE), the mean absolute error (MAE), the root mean square error (RMSE) and the index of agreement (IoA). High accuracy ( $R^2$  and IoA close to 1) and minimal errors (MBE, MAE, and RMSE close to 0) are the desired performances for an optimal prediction model. MBE provides a good indication of the mean over or under estimate of predictions, while MAE provides a good indication of the mean error regardless of whether it is an over or under estimate. The RMSE provides an overall measure of how close modelled values are to predicted values.  $R^2$  represents the amount of the variance for an air pollutant concentration that is explained by meteorological and time variables used. Moreover, the dimensionless IoA is also included in the analysis to illustrate the agreement between the values. All these metrics together explain whether the models have taken into account the most appropriate variables to describe the air pollutant concentrations patterns and whether they perform reasonable predictions.

**Table S1.** Statistical indicators.

| Statistic name               | Equation                                                                                                                                                                                                                                                                                                          |
|------------------------------|-------------------------------------------------------------------------------------------------------------------------------------------------------------------------------------------------------------------------------------------------------------------------------------------------------------------|
| Mean Bias Error              | $MBE = \frac{1}{N} \sum_{i=1}^N M_i - O_i$                                                                                                                                                                                                                                                                        |
| Mean Absolute Error          | $MAE = \frac{1}{N} \sum_{i=1}^N  M_i - O_i $                                                                                                                                                                                                                                                                      |
| Root Mean Squared Error      | $RMSE = \sqrt{\left( \frac{\sum_{i=1}^N (M_i - O_i)^2}{N} \right)}$                                                                                                                                                                                                                                               |
| Coefficient of Determination | $R^2 = \left( \frac{\{\sum_{i=1}^N (M_i - \bar{M})(O_i - \bar{O})\}}{\{\sum_{i=1}^N (M_i - \bar{M})^2 (O_i - \bar{O})^2\}^{\frac{1}{2}}} \right)^2$                                                                                                                                                               |
| Index of Agreement           | $IoA = 1 - \frac{\sum_{i=1}^N  M_i - O_i }{c \sum_{i=1}^N  O_i - \bar{O} }$ , when $\sum_{i=1}^N  M_i - O_i  \leq c \sum_{i=1}^N  O_i - \bar{O} $<br>$IoA = \frac{c \sum_{i=1}^N  O_i - \bar{O} }{\sum_{i=1}^N  M_i - O_i } - 1$ , when $\sum_{i=1}^N  M_i - O_i  > c \sum_{i=1}^N  O_i - \bar{O} $<br>with $c=2$ |

Where:

$N$  = total number of measurements;  $M_i$  =  $i$ th predicted value;  $O_i$  =  $i$ th observed value;  $\bar{M}$  = mean of the predicted values;  $\bar{O}$  = mean of the observed values

## Statistical results

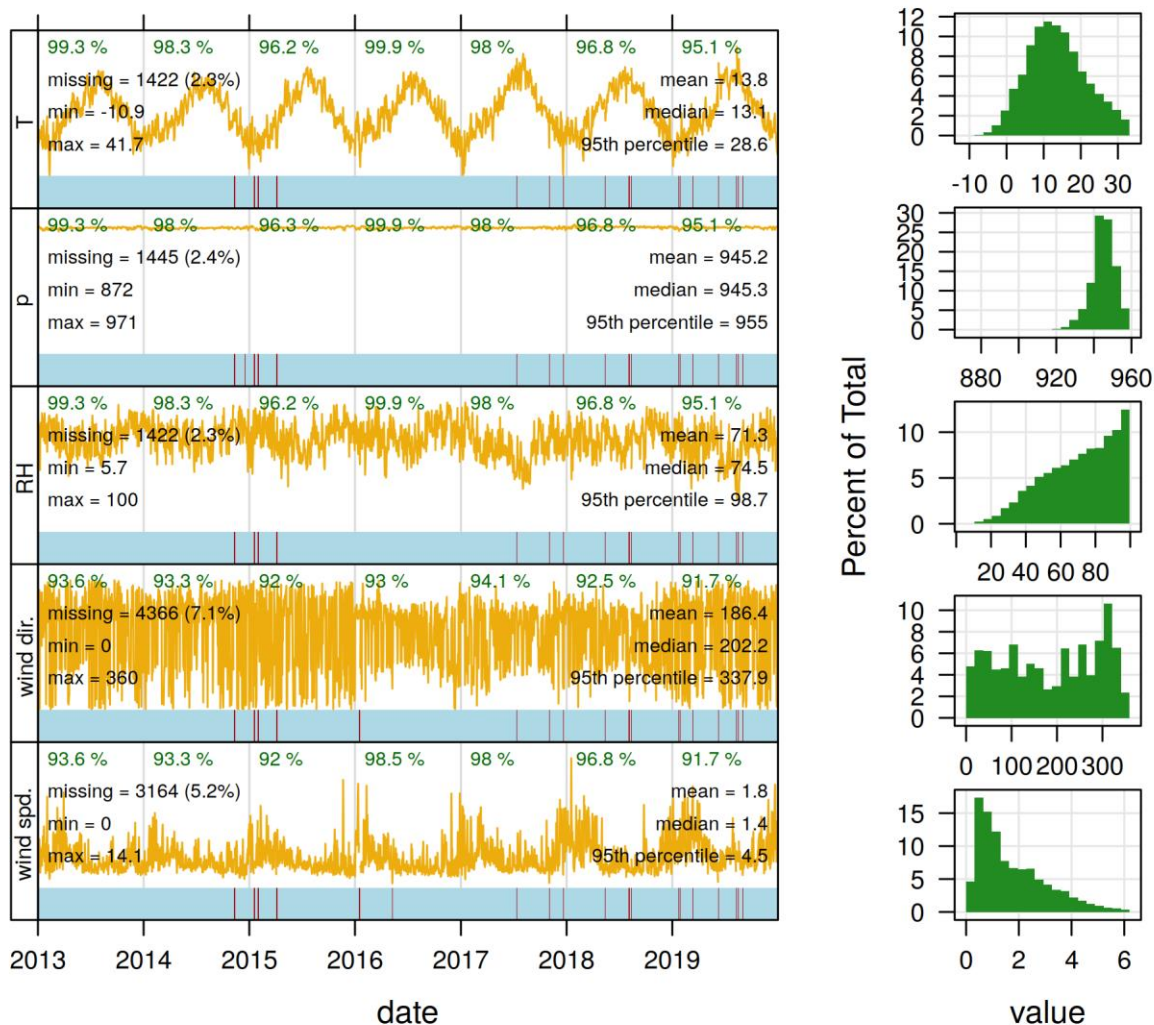

**Figure S1.** Left panel: the time series data of hourly T, p, H, wd and ws values (yellow lines,) and the availability and non-availability of the data (respectively the blue and red colors on the rectangular bar at the bottom of the plots). The minimum, maximum, number and percent of missing data, mean, median and the 95th percentile for each variable plotted (in black). The percentage of the data captured for every year (in green) on the upper part of each year data plot. Right panel: the distribution of each variable using a histogram plot over the selected periods.

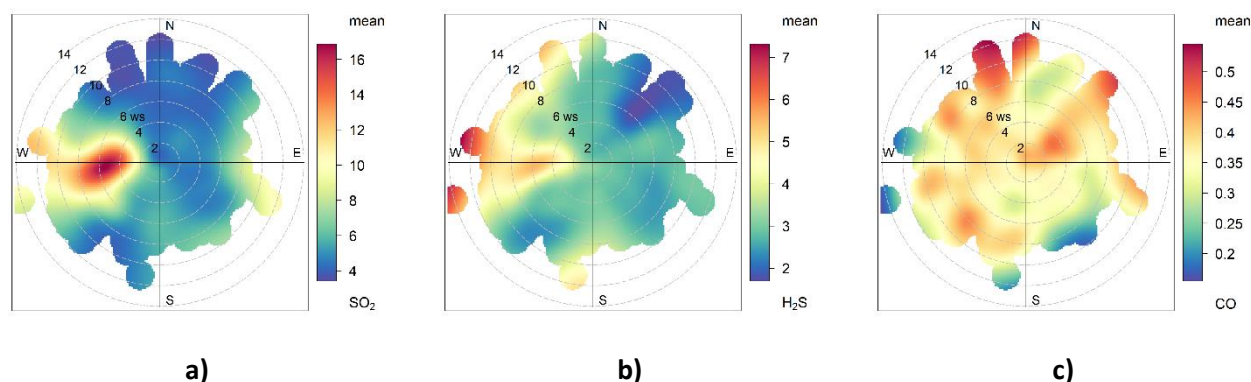

**Figure S2.** Polar Plot of hourly concentrations of (a) SO<sub>2</sub>, (b) H<sub>2</sub>S and (c) CO over the 2013-2019 period.

**Table S2.** Change points in the meteorologically normalised concentrations of the selected pollutants.

| id | NO <sub>x</sub> | CO         | SO <sub>2</sub> | H <sub>2</sub> S |
|----|-----------------|------------|-----------------|------------------|
| 1  | 09/03/2016      | 19/10/2015 | 24/04/2018      | 28/03/2014       |
| 2  | 08/10/2013      | 19/05/2017 | 31/12/2014      | 12/11/2014       |
| 3  | 04/10/2015      | 09/04/2019 | 02/08/2016      | 09/02/2019       |
| 4  | 14/08/2016      | 08/09/2013 | 12/06/2015      | 02/08/2016       |
| 5  | 09/02/2018      | 05/05/2016 | 27/02/2014      | 20/10/2016       |
| 6  | 13/10/2018      | 06/03/2014 | 20/10/2016      | 15/05/2017       |
| 7  | 13/10/2019      | 18/07/2018 | 16/07/2017      | 16/11/2018       |
| 8  | 14/02/2019      | 15/10/2019 | 07/05/2019      | 15/01/2018       |
| 9  | 14/01/2017      | 18/04/2013 | 24/09/2019      | 07/02/2018       |
| 10 | 14/10/2017      | 09/06/2014 | 05/04/2016      | 22/06/2015       |
| 11 | 12/10/2016      | 19/09/2016 | 02/09/2014      | 09/05/2019       |
| 12 | 30/03/2016      | 10/12/2019 | 16/12/2019      | 06/03/2017       |
| 13 | 15/02/2016      | 19/05/2015 | 31/12/2015      | 21/11/2013       |
| 14 | 11/11/2015      | 02/05/2014 | 23/02/2018      | 02/08/2018       |
